# Supplementary material for: 映像の中の冷戦後世界 : ロシア・ドイツ・東欧研究とフィルム・アーカイブ
Source: Royal Society of Chemistry journal article supplement (doi:10.1039/c6cs00491a), 2013-01-01
Supplement: c6cs00491a1.pdf [file c6cs00491a1.pdf]

*Electronic Supplementary Information*

## **Single lithium-ion conducting solid polymer electrolytes: advances and perspectives**

Heng Zhang,<sup>\*a</sup> Chunmei Li,<sup>a</sup> Michal Piszcz,<sup>a</sup> Estibaliz Coya,<sup>a</sup> Teofilo Rojo,<sup>a</sup> Lide M. Rodriguez-  
Martinez,<sup>a</sup> Michel Armand<sup>\*a</sup> and Zhibin Zhou<sup>\*b</sup>

<sup>a</sup> *CIC Energigune, Albert Einstein 48, 01510 Miñano, Álava, Spain.*

*E-mail: hzhang@cicenergigune.com; marmand@cicenergigune.com.*

<sup>b</sup> *Key Laboratory for Large-Format Battery Materials and System-Ministry of Education,  
School of Chemistry and Chemical Engineering, Huazhong University of Science and  
Technology, Wuhan 430074, China.*

*E-mail: zb-zhou@mail.hust.edu.cn*

**Table S1** The physicochemical properties of some representative electrolytes.

| Electrolyte                                              | Component <sup>a</sup>                                                                | $\sigma^b / \text{S cm}^{-1}$ | LTN <sup>c</sup> | $\sigma_{\text{Li}^+}^d / \text{S cm}^{-1}$ | Ref. |
|----------------------------------------------------------|---------------------------------------------------------------------------------------|-------------------------------|------------------|---------------------------------------------|------|
| Liquid electrolytes                                      |                                                                                       |                               |                  |                                             |      |
|                                                          | 1 M LiPF <sub>6</sub> -EC/EMC                                                         | $1.5 \times 10^{-2}$ (60 °C)  | 0.2 (60 °C)      | $3 \times 10^{-3}$ (60 °C)                  | 1, 2 |
|                                                          | 1 M LiClO <sub>4</sub> -EC/EMC                                                        | $1.0 \times 10^{-2}$ (60 °C)  | 0.4 (60 °C)      | $4.0 \times 10^{-3}$ (60 °C)                | 1, 2 |
|                                                          | 1 M LiTFSI-EC/EMC                                                                     | $1.2 \times 10^{-2}$ (60 °C)  | 0.5 (60 °C)      | $6.0 \times 10^{-3}$ (60 °C)                | 1, 2 |
|                                                          | 1 M LiFSI-EC/EMC                                                                      | $1.4 \times 10^{-2}$ (60 °C)  | 0.5 (60 °C)      | $7.0 \times 10^{-3}$ (60 °C)                | 1, 2 |
| Gel polymer electrolytes                                 |                                                                                       |                               |                  |                                             |      |
|                                                          | LiClO <sub>4</sub> /PAN-EC/EMC                                                        | $6.0 \times 10^{-3}$ (60 °C)  | 0.5 (60 °C)      | $3.0 \times 10^{-3}$ (60 °C)                | 3    |
|                                                          | LiTFSI/PEO-MEEP                                                                       | $1.0 \times 10^{-3}$ (60 °C)  | 0.5 (60 °C)      | $5.0 \times 10^{-4}$ (60 °C)                | 4    |
|                                                          | LiClO <sub>4</sub> /PMMA-PC                                                           | $1.0 \times 10^{-3}$ (60 °C)  | 0.4 (60 °C)      | $4.0 \times 10^{-4}$ (60 °C)                | 5    |
|                                                          | LiPF <sub>6</sub> /PVdF-HFP-<br>EC/DMC/EMC                                            | $5.0 \times 10^{-3}$ (60 °C)  | 0.5 (60 °C)      | $2.5 \times 10^{-4}$ (60 °C)                | 6    |
| Ceramic electrolytes                                     |                                                                                       |                               |                  |                                             |      |
|                                                          | Amorphous LiPON                                                                       | $10^{-4}$                     | 1.0 (70 °C)      | $10^{-4}$ (70 °C)                           | 7    |
|                                                          | Li <sub>0.34</sub> La <sub>0.51</sub> TiO <sub>2.94</sub>                             | $10^{-2}$ (80 °C)             | 1.0 (80 °C)      | $10^{-2}$ (80 °C)                           | 8    |
|                                                          | Li <sub>6.55</sub> La <sub>3</sub> Zr <sub>2</sub> Ga <sub>0.15</sub> O <sub>12</sub> | $10^{-2}$ (80 °C)             | 1.0 (80 °C)      | $10^{-2}$ (80 °C)                           | 9    |
|                                                          | Li <sub>10</sub> GeP <sub>2</sub> S <sub>12</sub>                                     | $4 \times 10^{-2}$ (65 °C)    | 1.0 (65 °C)      | $4 \times 10^{-2}$ (65 °C)                  | 10   |
| Solid polymer electrolytes                               |                                                                                       |                               |                  |                                             |      |
|                                                          | LiBF <sub>4</sub> /PEO                                                                | $10^{-4}$ (70 °C)             | 0.32 (70 °C)     | $3.0 \times 10^{-5}$ (70 °C)                | 11   |
|                                                          | LiTFSI/PEO                                                                            | $1.1 \times 10^{-3}$ (80 °C)  | 0.18 (80 °C)     | $2.0 \times 10^{-4}$ (80 °C)                | 12   |
|                                                          | LiBETI/PEO                                                                            | $6.1 \times 10^{-4}$ (80 °C)  | 0.33 (80 °C)     | $2.0 \times 10^{-4}$ (80 °C)                | 13   |
|                                                          | LiFSI/PEO                                                                             | $1.4 \times 10^{-3}$ (80 °C)  | 0.14 (80 °C)     | $2.2 \times 10^{-4}$ (80 °C)                | 12   |
| Single lithium-ion conducting solid polymer electrolytes |                                                                                       |                               |                  |                                             |      |
|                                                          | LiPSS/PEO                                                                             | $10^{-7}$ (70 °C)             | 0.9–1.0 (70 °C)  | $10^{-7}$ (70 °C)                           | 14   |
|                                                          | LiPSFSI/PEO                                                                           | $10^{-6}$ (70 °C)             | 0.9–1.0 (70 °C)  | $10^{-6}$ (70 °C)                           | 15   |
|                                                          | LiPSTFSI/PEO                                                                          | $10^{-5}$ (70 °C)             | 0.9–1.0 (70 °C)  | $10^{-5}$ (70 °C)                           | 14   |
|                                                          | LiPSsTFSI/PEO                                                                         | $10^{-4}$ (70 °C)             | 0.9–1.0 (70 °C)  | $10^{-4}$ (70 °C)                           | 14   |

<sup>a</sup> Abbreviations: lithium hexafluorophosphate (LiPF<sub>6</sub>); ethylene carbonate (EC); ethyl-methyl-carbonate (EMC); lithium perchlorate (LiClO<sub>4</sub>); lithium bis(trifluoromethylsulfonyl)imide ([[(CF<sub>3</sub>SO<sub>2</sub>)<sub>2</sub>N]Li, LiTFSI); lithium bis(fluorosulfonyl)imide ([[(FSO<sub>2</sub>)<sub>2</sub>N]Li, LiFSI); poly(acrylonitrile) (PAN); poly(ethylene oxide) (PEO); poly[bis((methoxyethoxy)ethoxy)phosphazene] (MEEP); poly(methylmethacrylate) (PMMA); propylene carbonate (PC); poly(vinylidene fluoride-hexafluoro propylene) (PVdF-HFP); dimethylcarbonate (DMC); lithium phosphorus oxynitride (LiPON); lithium tetrafluoroborate (LiBF<sub>4</sub>); lithium bis(trifluoromethanesulfonyl)imide ([[(C<sub>2</sub>F<sub>5</sub>SO<sub>2</sub>)<sub>2</sub>N]Li, LiBETI); lithium poly(4-styrenesulfonate) (LiPSS); lithium poly[(4-styrenesulfonyl)(trifluorosulfonyl)imide] (LiPSFSI); poly[(4-styrenesulfonyl)(trifluoromethanesulfonyl)imide] (LiPSTFSI); lithium poly[(4-styrenesulfonyl)(trifluoromethane(*S*-trifluoromethanesulfonylimino)sulfonyl)imide] (LiPSsTFSI).

<sup>b</sup> Total ionic conductivity ( $\sigma$ ).

<sup>c</sup> Li-ion transference number (LTN).

<sup>d</sup> Individual Li-ion conductivity ( $\sigma_{\text{Li}^+} = \sigma \times \text{LTN}$ ).

## References

1. L. Li, S. Zhou, H. Han, H. Li, J. Nie, M. Armand, Z. Zhou and X. Huang, *J. Electrochem. Soc.*, 2011, **158**, A74-A82.
2. H. Han, S. Zhou, D. Zhang, S. Feng, L. Li, K. Liu, W. Feng, J. Nie, H. Li and X. Huang, M. Armand, and Z. Zhou, *J. Power Sources*, 2011, **196**, 3623-3632.
3. G. B. Appetecchi and B. Scrosati, *Electrochim. Acta*, 1998, **43**, 1105-1107.
4. K. M. Abraham and M. Alamgir, *J. Power Sources*, 1993, **43**, 195-208.
5. G. B. Appetecchi, F. Croce and B. Scrosati, *Electrochim. Acta*, 1995, **40**, 991-997.
6. H. Xie, Z. Tang, Z. Li, Y. He, Y. Liu and H. Wang, *J. Solid State Electrochem.*, 2008, **12**, 1497-1502.
7. X. Yu, J. B. Bates, G. E. Jellison and F. X. Hart, *J. Electrochem. Soc.*, 1997, **144**, 524-532.
8. Y. Inaguma, C. Liqun, M. Itoh, T. Nakamura, T. Uchida, H. Ikuta and M. Wakihara, *Solid State Commun.*, 1993, **86**, 689-693.
9. C. Bernuy-Lopez, W. Manalastas, J. M. Lopez del Amo, A. Aguadero, F. Aguesse and J. A. Kilner, *Chem. Mater.*, 2014, **26**, 3610-3617.
10. N. Kamaya, K. Homma, Y. Yamakawa, M. Hirayama, R. Kanno, M. Yonemura, T. Kamiyama, Y. Kato, S. Hama, K. Kawamoto and A. Mitsui, *Nat. Mater.*, 2011, **10**, 682-686.
11. M. Kalita, M. Bukat, M. Ciosek, M. Siekierski, S. H. Chung, T. Rodríguez, S. G. Greenbaum, R. Kovarsky, D. Golodnitsky, E. Peled, D. Zane, B. Scrosati and W. Wieczorek, *Electrochim. Acta*, 2005, **50**, 3942-3948.
12. H. Zhang, C. Liu, L. Zheng, F. Xu, W. Feng, H. Li, X. Huang, M. Armand, J. Nie and Z. Zhou, *Electrochim. Acta*, 2014, **133**, 529-538.
13. J. H. Shin and S. Passerini, *J. Electrochem. Soc.*, 2004, **151**, A238-A245.
14. Q. Ma, H. Zhang, C. Zhou, L. Zheng, P. Cheng, J. Nie, W. Feng, Y. Hu, H. Li, X. Huang, L. Chen, M. Armand and Z. Zhou, *Angew. Chem.*, 2016, **55**, 2521-2525.
15. Q. Ma, Y. Xia, W. Feng, J. Nie, Y. Hu, H. Li, X. Huang, L. Chen, M. Armand and Z. Zhou, *RSC Adv.*, 2016, **6**, 32454-32461.
